# Supplementary material
Source: PubMed Central journal article supplement (PMC2732297)
Supplement: btn577_1.pdf [file btn577_1.pdf]

# Supplementary Material for: A Novel Signaling Pathway Impact Analysis (SPIA)

Adi Laurentiu Tarca<sup>1,2</sup>, Sorin Draghici<sup>1,3</sup>, Purvesh Khatri<sup>2</sup>, Sonia S. Hassan<sup>2</sup>, Pooja Mittal<sup>2</sup>, Jung-sun Kim<sup>2</sup>, Chong Jai Kim<sup>2</sup>, Juan Pedro Kusanovic<sup>2</sup> & Roberto Romero<sup>2</sup>

<sup>1</sup>Dept. of Computer Science, Wayne State University, 431 State Hall, Detroit, MI 48202

<sup>2</sup>Perinatology Research Branch-NIH/NICHD, 4 Brush, 3990 John R, Detroit, MI 48201

<sup>3</sup>Corresponding author

Received on XXXXX; revised on XXXXX; accepted on XXXXX

Associate Editor: XXXXXXXX

## 1 COMPUTING PERTURBATION FACTORS

Let us consider the normalized weighted directed adjacency matrix of the graph describing the gene signaling network:

$$B = \begin{pmatrix} \frac{\beta_{11}}{N_{ds}(g_1)} & \frac{\beta_{12}}{N_{ds}(g_2)} & \dots & \frac{\beta_{1n}}{N_{ds}(g_n)} \\ \frac{\beta_{21}}{N_{ds}(g_1)} & \frac{\beta_{22}}{N_{ds}(g_2)} & \dots & \frac{\beta_{2n}}{N_{ds}(g_n)} \\ \dots & \dots & \dots & \dots \\ \frac{\beta_{n1}}{N_{ds}(g_1)} & \frac{\beta_{n2}}{N_{ds}(g_2)} & \dots & \frac{\beta_{nn}}{N_{ds}(g_n)} \end{pmatrix} \quad (1)$$

In this matrix,  $\beta_{ij}$  is the efficiency with which a unit perturbation of gene  $j$  is propagated to gene  $i$ , and  $N_{ds}(g_i)$  is the number of genes downstream of gene  $g_i$ . (node) would sum up to 1 if taken in absolute values.

Let the vector of measured log fold-changes be:

$$\Delta E = \begin{pmatrix} \Delta E(g_1) \\ \Delta E(g_2) \\ \dots \\ \Delta E(g_n) \end{pmatrix} \quad (2)$$

If a gene is not differentially expressed, its log fold-change is assigned the value 0. The vector of gene perturbation factors is:

$$PF = \begin{pmatrix} PF(g_1) \\ PF(g_2) \\ \dots \\ PF(g_n) \end{pmatrix} \quad (3)$$

Then, the equations defining the perturbations after reaching a stable state:

$$PF(g_i) = \Delta E(g_i) + \sum_{j=1}^n \beta_{ij} \cdot \frac{PF(g_j)}{N_{ds}(g_j)} \quad (4)$$

can be re-written as:

$$PF = \Delta E + B \cdot PF \quad (5)$$

while the net accumulations of the perturbations:

$$Acc(g_i) = PF(g_i) - \Delta E(g_i) \quad (6)$$

can also be re-written as:

$$Acc = PF - \Delta E = B \cdot PF \quad (7)$$

From Eq. 5 and 7, and assuming that the matrix  $I - B$  is non-singular, we can calculate:

$$Acc = B \cdot (I - B)^{-1} \cdot \Delta E \quad (8)$$

## 2 BOOTSTRAP PROCEDURE FOR COMPUTING A P-VALUE FROM PATHWAY PERTURBATIONS.

The computation of  $P_{PERT}$  for a given pathway is based on a bootstrap procedure in which we want to test if the observed global activation or inhibition of the pathway computed with the real data,  $t_A$  is unusual compared to a multitude of random scenarios. The step by step procedure we used is:

1. An iteration counter  $k$  is initialized ( $k = 1$ ).
2. A set of  $N_{de}(P_i)$  gene IDs is selected at random from the pathway  $P_i$  where the  $N_{de}(P_i)$  is the number of DE genes observed on the pathway with the real data. The log fold-changes for these random gene IDs are assigned by drawing a random sample with replacement from the distribution of all DE genes to be analyzed. item Eq. 8 is used to compute the perturbation accumulations  $Acc$ , for each gene in  $P_i$ . The net total accumulation is computed as the sum of all perturbation accumulations across each pathway:  $T_A(k) = \sum_i Acc(g_{ik})$ .
3. Steps 2 and 3 above are repeated a large number of times ( $N_{ite} = 2000$ ).
4. The median of  $T_A$  is computed and subtracted from  $T_A(k)$  values centering their distribution around 0. The resulting corrected values are denoted with  $T_{A,c}(k)$ . The observed net total accumulation is also corrected for the shift in the null distribution median to give,  $t_{A,c}$ .
5. If  $t_{A,c}$  is positive then we conclude that the pathway is activated (or positively perturbed). If  $t_{A,c}$  is negative then we assume that the pathway is inhibited (or negatively perturbed).

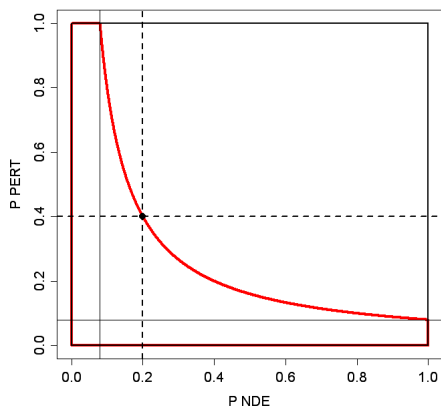

**Fig. 1.** Combining  $P_{NDE}$  and  $P_{PERT}$  into a single probability value,  $P_G$ . The black rectangle  $[0,1] \times [0,1]$  contains all possible values that  $P_{NDE}$  and  $P_{PERT}$  can take. The curve shown is the locus of all combinations of 2 p-values that have the same product  $P_{NDE} \cdot P_{PERT} = c$  (which for this example is:  $c = 0.2 \cdot 0.4 = 0.08$ ). The points under and to the left of this curve represent all combinations that would yield a product less than 0.08. The red contour designates the surface whose area is  $P_G$  for the chosen example of the pair ( $P_{NDE} = 0.2$  and  $P_{PERT} = 0.4$ ) (black dot), under the null hypothesis. The  $P_G$  is the probability to have such a combination which can be quantified as the ratio of the area under the curve divided by the entire area of the square (which is 1). In this case,  $P_G = 0.282$ .

- The probability to observe such total net inhibition or activation just by chance,  $P_{PERT}$ , is computed as:

$$P_{PERT} = \begin{cases} 2 \cdot \frac{\sum_k I(T_{A,c}(k) \geq t_{A,c})}{N_{ite}} & \text{if } t_{A,c} \geq 0 \\ 2 \cdot \frac{\sum_k I(T_{A,c}(k) \leq t_{A,c})}{N_{ite}} & \text{otherwise} \end{cases}$$

where the identity function  $I(x)$  returns 1 if  $x$  is true and 0 otherwise. The multiplication by 2 accounts for a two-tailed test, since we do not have a particular expectation regarding the pathway status (inhibited or activated).

### 3 COMBINING $P_{NDE}$ AND $P_{PERT}$ AND INTO A GLOBAL PATHWAY SIGNIFICANCE MEASURE.

After computing a p-value for both types of evidence,  $P_{NDE}$  and  $P_{PERT}$ , we need to combine these two probabilities into one global

probability value,  $P_G$ , that will be used to rank the pathways and test the research hypothesis, that the pathway is significantly impacted in the condition studied. The probability that a pair of p-values,  $(P_{NDE}, P_{PERT})$ , is observed when the null hypothesis is true, can be computed based on the fact that, under the null hypothesis, a p-value is a uniformly distributed random variable on the interval  $(0, 1)$ . The surface of all theoretically possible values that the variables  $P_{NDE}$  and  $P_{PERT}$  can take is a square with unity area. The two probability values obtained for a given pathway  $P_i$  can be represented as a point within this square  $(P_{NDE}(i), P_{PERT}(i))$ , as shown in Fig. 1.

$P_{PERT}(i)$ ). Since under the null hypothesis  $P_{NDE}(i)$  and  $P_{PERT}(i)$  are independent probabilities, they can be multiplied to give the joint probability of obtaining the observed number of DE genes and the observed perturbation at the same time. The geometrical locus of the points with the same joint probability is the hyperbola  $P_{NDE}(i) \cdot P_{PERT}(i) = c$ . The probability to obtain a set of p-values as extreme or more extreme than  $(P_{NDE}(i), P_{PERT}(i))$ , is the area under and to the left of this hyperbola. The sought global probability  $P_G$  is the probability to have such a combination with a product less than or equal to that observed. Hence,  $P_G$  can be quantified as the ratio of the area under the curve divided by the entire area of the square (which is 1):

$$P_G = \int_0^c 1 \cdot dx + \int_c^1 \frac{1}{x} \cdot dx = c + c \cdot \ln x|_c^1 = c - c \cdot \ln c \quad (9)$$

In the example shown in Fig. 1,  $P_{NDE}(i) = 0.2$  and  $P_{PERT}(i) = 0.4$  which yields  $P_G(i) = 0.282$ . Eq. 9 can be used to calculate the constant  $c$  for any desired significance threshold  $\alpha$ . For instance, for the customary  $\alpha = 0.05$ , the product of the two individual probabilities can be calculated as  $c = 0.0087$ , a value which has been independently obtained by others (Loughin, 2004).

Since several pathways are tested simultaneously, we also need to consider adjusting the nominal  $P_G(i)$  values for multiple comparisons. For the convenience of the user, the package implementing SPIA provides both Bonferroni- and FDR-corrected p-values.

### 4 SUPPLEMENTARY TABLES 1-10

### REFERENCES

Loughin, T. (2004) A systematic comparison of methods for combining p-values from independent tests. *Computational Statistics and Data Analysis*, **47** (3), 467 – 485.

**Table 1.** GSEA results on the Colorectal cancer dataset. Enrichment in cancer group. Output from R GSEA V 1.0.

|                  | NOM p-val | FDR q-val | FWER p-val | FDR (median) | glob.p.val |
|------------------|-----------|-----------|------------|--------------|------------|
| Parkinsons..5020 | 0.008048  | 0.34709   | 0.192      | 0            | 0.155      |
| Wnt signal..4310 | 0.01359   | 0.38628   | 0.354      | 0            | 0.14       |
| Complement..4610 | 0.01961   | 0.31692   | 0.404      | 0            | 0.087      |
| MAPK signa..4010 | 0.02115   | 0.17632   | 0.554      | 0.11785      | 0.011      |
| Gap juncti..4540 | 0.02745   | 0.19836   | 0.657      | 0.14463      | 0.006      |
| Axon guida..4360 | 0.02994   | 0.20308   | 0.484      | 0            | 0.03       |
| Basal cell..5217 | 0.03571   | 0.23785   | 0.479      | 0            | 0.044      |
| Colorectal..5210 | 0.03868   | 0.18203   | 0.528      | 0.12153      | 0.017      |
| mTOR signa..4150 | 0.05253   | 0.16795   | 0.571      | 0.10938      | 0.004      |
| Focal adhe..4510 | 0.06114   | 0.28562   | 0.466      | 0            | 0.07       |
| ECM-recept..4512 | 0.06759   | 0.19884   | 0.513      | 0.13158      | 0.025      |
| Regulation..4810 | 0.07968   | 0.23706   | 0.732      | 0.17157      | 0.01       |
| Renal cell..5211 | 0.1053    | 0.34187   | 0.903      | 0.28226      | 0.015      |
| Type II di..4930 | 0.1076    | 0.33158   | 0.848      | 0.26055      | 0.029      |
| Melanogene..4916 | 0.1804    | 0.3619    | 0.942      | 0.3114       | 0.017      |

**Table 2.** GSEA results on the Colorectal cancer dataset. Enrichment in normal group. Output from R GSEA V 1.0.

|                  | NOM p-val | FDR q-val | FWER p-val | FDR (median) | glob.p.val |
|------------------|-----------|-----------|------------|--------------|------------|
| Huntington..5040 | 0.1094    | 1         | 0.768      | 1            | 0.535      |
| Dentatorub..5050 | 0.2189    | 1         | 0.896      | 1            | 0.592      |
| SNARE inte..4130 | 0.2633    | 1         | 0.936      | 1            | 0.541      |
| PPAR signa..3320 | 0.3247    | 1         | 0.96       | 1            | 0.525      |
| Olfactory ..4740 | 0.3648    | 1         | 0.985      | 1            | 0.56       |
| GnRH signa..4912 | 0.3908    | 0.93841   | 0.985      | 0.92687      | 0.446      |
| Cell cycle..4110 | 0.4065    | 1         | 0.981      | 1            | 0.603      |
| ErbB signa..4012 | 0.4345    | 0.83531   | 0.986      | 0.82639      | 0.351      |
| Insulin si..4910 | 0.519     | 0.94025   | 0.996      | 0.96997      | 0.466      |
| Thyroid ca..5216 | 0.5369    | 0.79603   | 0.997      | 0.81818      | 0.249      |
| Ubiquitin ..4120 | 0.574     | 0.76453   | 0.999      | 0.77493      | 0.165      |
| Tight junc..4530 | 0.5866    | 0.85592   | 0.996      | 0.87931      | 0.342      |
| Phosphatid..4070 | 0.6321    | 0.73111   | 0.999      | 0.7517       | 0.091      |
| Maturity o..4950 | 0.6604    | 0.72686   | 1          | 0.74598      | 0.058      |
| Adipocytok..4920 | 0.6654    | 0.8032    | 0.999      | 0.82018      | 0.233      |

Table 3. SPIA results on the Vessels dataset

| KEGG Pathway     | $P_{NDE}$ | $P_{PERT}$ | $P_G$  | $P_{G,FDR}$ | $P_{G,FWER}$ | Status    |
|------------------|-----------|------------|--------|-------------|--------------|-----------|
| Antigen pr..4612 | 0.0067    | 0.0004     | 0.0000 | 0.0016      | 0.0016       | Activated |
| Axon guida..4360 | 0.0002    | 0.0908     | 0.0002 | 0.0045      | 0.0090       | Inhibited |
| Neuroactiv..4080 | 0.0006    | 0.1992     | 0.0012 | 0.0170      | 0.0514       | Inhibited |
| Focal adhe..4510 | 0.0003    | 0.5364     | 0.0016 | 0.0170      | 0.0681       | Inhibited |
| Wnt signal..4310 | 0.0008    | 0.4244     | 0.0032 | 0.0251      | 0.1356       | Activated |
| Regulation..4810 | 0.0042    | 0.0948     | 0.0035 | 0.0251      | 0.1508       | Activated |
| Type I dia..4940 | 0.0011    | 1.0000     | 0.0083 | 0.0469      | 0.3556       | Inhibited |
| Complement..4610 | 0.0023    | 0.4812     | 0.0087 | 0.0469      | 0.3750       | Activated |
| Notch sign..4330 | 0.0392    | 0.0468     | 0.0134 | 0.0579      | 0.5756       | Activated |
| ECM-recept..4512 | 0.0024    | 0.7560     | 0.0135 | 0.0579      | 0.5789       | Inhibited |
| Cytokine-c..4060 | 0.0453    | 0.2172     | 0.0553 | 0.2161      | 1.0000       | Inhibited |
| Gap juncti..4540 | 0.0970    | 0.1236     | 0.0650 | 0.2331      | 1.0000       | Inhibited |
| TGF-beta s..4350 | 0.0262    | 0.5224     | 0.0724 | 0.2396      | 1.0000       | Inhibited |
| Tight junc..4530 | 0.2171    | 0.0700     | 0.0788 | 0.2421      | 1.0000       | Inhibited |
| Adherens j..4520 | 0.0598    | 0.3112     | 0.0927 | 0.2659      | 1.0000       | Activated |

Table 4. ORA results on the Vessels dataset

| KEGG Pathway     | $P_{NDE}$ | $P_{NDE,FDR}$ | $P_{NDE,FWER}$ |
|------------------|-----------|---------------|----------------|
| Axon guida..4360 | 0.0002    | 0.0065        | 0.0083         |
| Focal adhe..4510 | 0.0003    | 0.0065        | 0.0131         |
| Neuroactiv..4080 | 0.0006    | 0.0086        | 0.0257         |
| Wnt signal..4310 | 0.0008    | 0.0089        | 0.0357         |
| Type I dia..4940 | 0.0011    | 0.0091        | 0.0453         |
| Complement..4610 | 0.0023    | 0.0150        | 0.1000         |
| ECM-recept..4512 | 0.0024    | 0.0150        | 0.1050         |
| Regulation..4810 | 0.0042    | 0.0225        | 0.1801         |
| Antigen pr..4612 | 0.0067    | 0.0321        | 0.2886         |
| TGF-beta s..4350 | 0.0262    | 0.1127        | 1.0000         |
| Notch sign..4330 | 0.0392    | 0.1390        | 1.0000         |
| Renal cell..5211 | 0.0405    | 0.1390        | 1.0000         |
| MAPK signa..4010 | 0.0442    | 0.1390        | 1.0000         |
| Cytokine-c..4060 | 0.0453    | 0.1390        | 1.0000         |
| GnRH signa..4912 | 0.0502    | 0.1438        | 1.0000         |

**Table 5.** GSEA results on the Vessels dataset, enrichment in UA group. Output from R GSEA V 1.0.

| KEGG Pathway     | NOM p-val | FDR q-val | FWER p-val | FDR(median) | glob.p.val |
|------------------|-----------|-----------|------------|-------------|------------|
| Renal cell..5211 | 0.002953  | 1         | 0.5845     | 0.90625     | 0.4725     |
| Cell cycle..4110 | 0.02559   | 0.71623   | 0.638      | 0.53704     | 0.274      |
| Huntington..5040 | 0.07707   | 0.80367   | 0.787      | 0.66667     | 0.334      |
| Thyroid ca..5216 | 0.1374    | 0.69938   | 0.8915     | 0.64444     | 0.2555     |
| SNARE inte..4130 | 0.1621    | 0.607     | 0.7885     | 0.51786     | 0.217      |
| Gap juncti..4540 | 0.2102    | 0.9406    | 0.941      | 0.90344     | 0.432      |
| Axon guida..4360 | 0.2205    | 0.75634   | 0.958      | 0.74571     | 0.285      |
| Maturity o..4950 | 0.224     | 0.80301   | 0.8865     | 0.74839     | 0.3435     |
| Melanogene..4916 | 0.2933    | 0.80577   | 0.9755     | 0.79091     | 0.337      |
| Focal adhe..4510 | 0.344     | 0.83775   | 0.958      | 0.82857     | 0.3575     |
| Long-term ..4730 | 0.3685    | 0.78456   | 0.9805     | 0.77679     | 0.307      |
| Tight junc..4530 | 0.3835    | 0.91601   | 0.9555     | 0.88176     | 0.4235     |
| TGF-beta s..4350 | 0.4477    | 0.78065   | 0.9815     | 0.78733     | 0.297      |
| ECM-recept..4512 | 0.4477    | 0.90872   | 0.9905     | 0.91143     | 0.418      |
| PPAR signa..3320 | 0.5045    | 0.76883   | 0.994      | 0.78628     | 0.256      |

**Table 6.** GSEA results on the Vessels dataset, enrichment in UV group. Output from R GSEA V 1.0.

| KEGG Pathway     | NOM p-val | FDR q-val | FWER p-val | FDR(median) | glob.p.val |
|------------------|-----------|-----------|------------|-------------|------------|
| Insulin si..4910 | 0.01515   | 0.47717   | 0.7915     | 0.39286     | 0.1165     |
| Type II di..4930 | 0.06825   | 0.74158   | 0.7255     | 0.61111     | 0.303      |
| Toll-like ..4620 | 0.07475   | 1         | 0.6295     | 0.81481     | 0.445      |
| Parkinsons..5020 | 0.1381    | 0.60681   | 0.779      | 0.52381     | 0.202      |
| Neuroactiv..4080 | 0.1388    | 0.42792   | 0.8725     | 0.39286     | 0.039      |
| ErbB signa..4012 | 0.1756    | 0.66679   | 0.9595     | 0.64706     | 0.218      |
| Type I dia..4940 | 0.2022    | 0.39259   | 0.8285     | 0.36667     | 0.04       |
| Antigen pr..4612 | 0.2377    | 0.46468   | 0.8265     | 0.44        | 0.091      |
| MAPK signa..4010 | 0.2721    | 0.74577   | 0.9815     | 0.73333     | 0.2695     |
| Adipocytok..4920 | 0.2964    | 0.69667   | 0.9845     | 0.69565     | 0.2325     |
| Natural ki..4650 | 0.3005    | 0.67092   | 0.9695     | 0.65812     | 0.2045     |
| Cytokine-c..4060 | 0.338     | 0.69065   | 0.986      | 0.6875      | 0.1915     |
| Alzheimers..5010 | 0.5056    | 0.89088   | 0.993      | 0.91124     | 0.401      |
| Taste tran..4742 | 0.5474    | 0.74295   | 0.993      | 0.76389     | 0.155      |
| Epithelial..5120 | 0.562     | 0.76919   | 0.993      | 0.78571     | 0.2225     |

Table 7. SPIA results on the LaborM dataset

| KEGG Pathway     | $P_{NDE}$ | $P_{PERT}$ | $P_G$  | $P_{G,FDR}$ | $P_{G,FWER}$ | Status    |
|------------------|-----------|------------|--------|-------------|--------------|-----------|
| Cytokine-c..4060 | 0.0000    | 0.0000     | 0.0000 | 0.0000      | 0.0000       | Activated |
| ErbB signa..4012 | 0.0000    | 0.0112     | 0.0000 | 0.0001      | 0.0002       | Activated |
| Jak-STAT s..4630 | 0.0000    | 0.2140     | 0.0000 | 0.0004      | 0.0011       | Activated |
| Epithelial..5120 | 0.0044    | 0.0024     | 0.0001 | 0.0015      | 0.0059       | Activated |
| Complement..4610 | 0.0003    | 0.0740     | 0.0003 | 0.0023      | 0.0113       | Inhibited |
| MAPK signa..4010 | 0.0011    | 0.4076     | 0.0038 | 0.0288      | 0.1726       | Activated |
| Toll-like ..4620 | 0.0007    | 0.9344     | 0.0058 | 0.0370      | 0.2591       | Activated |
| Adipocytok..4920 | 0.0063    | 0.4524     | 0.0195 | 0.1099      | 0.8793       | Activated |
| PPAR signa..3320 | 0.0044    | 1.0000     | 0.0284 | 0.1218      | 1.0000       | Inhibited |
| TGF-beta s..4350 | 0.0408    | 0.1084     | 0.0284 | 0.1218      | 1.0000       | Activated |
| Insulin si..4910 | 0.0159    | 0.2944     | 0.0298 | 0.1218      | 1.0000       | Inhibited |
| Type II di..4930 | 0.0857    | 0.1668     | 0.0750 | 0.2813      | 1.0000       | Inhibited |
| Thyroid ca..5216 | 0.1189    | 0.1528     | 0.0910 | 0.2897      | 1.0000       | Inhibited |
| Wnt signal..4310 | 0.1143    | 0.1828     | 0.1017 | 0.2897      | 1.0000       | Inhibited |
| Circadian ..4710 | 0.0774    | 0.2704     | 0.1019 | 0.2897      | 1.0000       | Inhibited |

Table 8. ORA results on the LaborM dataset

| KEGG Pathway     | $P_{NDE}$ | $P_{NDE,FDR}$ | $P_{NDE,FWER}$ |
|------------------|-----------|---------------|----------------|
| Cytokine-c..4060 | 0.0000    | 0.0000        | 0.0000         |
| Jak-STAT s..4630 | 0.0000    | 0.0002        | 0.0004         |
| ErbB signa..4012 | 0.0000    | 0.0005        | 0.0014         |
| Complement..4610 | 0.0003    | 0.0032        | 0.0130         |
| Toll-like ..4620 | 0.0007    | 0.0067        | 0.0335         |
| MAPK signa..4010 | 0.0011    | 0.0081        | 0.0485         |
| PPAR signa..3320 | 0.0044    | 0.0249        | 0.1989         |
| Epithelial..5120 | 0.0044    | 0.0249        | 0.1989         |
| Adipocytok..4920 | 0.0063    | 0.0315        | 0.2833         |
| Insulin si..4910 | 0.0159    | 0.0715        | 0.7150         |
| Natural ki..4650 | 0.0283    | 0.1158        | 1.0000         |
| TGF-beta s..4350 | 0.0408    | 0.1531        | 1.0000         |
| Renal cell..5211 | 0.0521    | 0.1714        | 1.0000         |
| ECM-recept..4512 | 0.0533    | 0.1714        | 1.0000         |
| Circadian ..4710 | 0.0774    | 0.2263        | 1.0000         |

**Table 9.** GSEA results on the LaborM dataset, enrichment in TL group. Output from R GSEA V 1.0.

| KEGG Pathway     | NOM p-val | FDR q-val | FWER p-val | FDR(median) | glob.p.val |
|------------------|-----------|-----------|------------|-------------|------------|
| Epithelial..5120 | 0.00497   | 0.18574   | 0.1105     | 0           | 0.0965     |
| MAPK signa..4010 | 0.005066  | 0.13574   | 0.3995     | 0           | 0.007      |
| Cytokine-c..4060 | 0.008214  | 0.22727   | 0.318      | 0           | 0.0585     |
| ErbB signa..4012 | 0.01091   | 0.16509   | 0.3675     | 0           | 0.0185     |
| TGF-beta s..4350 | 0.01094   | 0.29343   | 0.2815     | 0           | 0.1215     |
| Jak-STAT s..4630 | 0.01132   | 0.14696   | 0.3835     | 0           | 0.013      |
| VEGF signa..4370 | 0.02198   | 0.18533   | 0.3405     | 0           | 0.0305     |
| Adipocytok..4920 | 0.02402   | 0.14489   | 0.491      | 0           | 0.006      |
| Complement..4610 | 0.04893   | 0.1504    | 0.4675     | 0           | 0.0085     |
| Toll-like ..4620 | 0.06592   | 0.16007   | 0.5515     | 0.11176     | 0.006      |
| Fc epsilon..4664 | 0.07407   | 0.16072   | 0.5785     | 0.11144     | 0.0035     |
| Insulin si..4910 | 0.08918   | 0.2541    | 0.828      | 0.20956     | 0.004      |
| Type II di..4930 | 0.09164   | 0.25983   | 0.77       | 0.20276     | 0.0105     |
| Renal cell..5211 | 0.09323   | 0.26766   | 0.7935     | 0.20879     | 0.0105     |
| Natural ki..4650 | 0.1095    | 0.16695   | 0.613      | 0.11728     | 0.0035     |

**Table 10.** GSEA results on the LaborM dataset, enrichment in TNL group. Output from R GSEA V 1.0.

| KEGG Pathway     | NOM p-val | FDR q-val | FWER p-val | FDR(median) | glob.p.val |
|------------------|-----------|-----------|------------|-------------|------------|
| Parkinsons..5020 | 0.2297    | 1         | 0.88       | 1           | 0.7075     |
| Melanogene..4916 | 0.268     | 1         | 0.985      | 1           | 0.8135     |
| Basal cell..5217 | 0.3283    | 1         | 0.9955     | 1           | 0.566      |
| Amyotrophi..5030 | 0.4055    | 1         | 0.9955     | 1           | 0.755      |
| Wnt signal..4310 | 0.4554    | 1         | 0.9995     | 1           | 0.628      |
| Phosphatid..4070 | 0.4956    | 1         | 0.9995     | 1           | 0.502      |
| Long-term ..4730 | 0.5726    | 0.97732   | 1          | 0.96571     | 0.46       |
| Thyroid ca..5216 | 0.6073    | 0.94022   | 1          | 0.93914     | 0.423      |
| Tight junc..4530 | 0.6633    | 0.90019   | 1          | 0.90794     | 0.3625     |
| Gap juncti..4540 | 0.8018    | 0.93991   | 1          | 0.9602      | 0.4185     |
| Olfactory ..4740 | 0.9208    | 1         | 1          | 1           | 0.9045     |
| Regulation..4140 | 0.9756    | 1         | 1          | 1           | 0.964      |
| Taste tran..4742 | 0.9902    | 0.98757   | 1          | 1           | 0.759      |
